# Supplementary material for: A Budyko framework for estimating how spatial heterogeneity and lateral moisture redistribution affect average evapotranspiration rates as seen from the atmosphere
Source: Copernicus journal article supplement (doi:10.5194/hess-2016-424), 2016-08-31
Supplement: Supplementary file [file hess-2016-424-RC2-supplement.pdf]

## **Review of HESS Manuscript # hess-2016-424**

Title: A Budyko framework for estimating how spatial heterogeneity and lateral moisture redistribution affect average evapotranspiration rates as seen from the atmosphere

Authors: E. Rouholahnejad and J. W. Kirchner

This paper describes how averaging of P & PET does not lead to an average E. The example used is within-catchment lateral transfers of water.

The paper is very well written. For the first time in many years, I did not locate any suggested correction. (I tried hard but could not find anything.) The presentation is a credit to the authors.

The paper is an interesting analysis on an important topic. One important contribution is that the authors present (analytical) estimates for the maximum effect.

I only have two substantive comments.

Page 3, lines 17-22. The authors use PET here as a generic descriptor of demand. Unfortunately, in Hydrologic practice, PET can mean many things (e.g. Penman Open Water, FAO-56, etc...). However, in the original scheme, Budyko actually used net irradiance (sometimes called available energy). It might be useful to point this out here.

Page 12, lines 26-28. A directly analogous result, based on almost identical logic, for averaging over time has been presented previously in HESS (Lim & Roderick, 2015 HESS 18, 31-45).

p. 13, line 3. A great example of this averaging can be found in Gerrits et al (2009, WRR, Vol. 45)

Michael L. Roderick  
Australian National University  
30/9/2016
